# Supplementary material
Source: Springer Nature journal article supplement (https://www.springermedizin.de/resource/supplementary/12936_2013_2868_MOESM1_ESM.pdf/9544462)

## **Additional file 1. A database of resistant *dhps* in African *P. falciparum* malaria**

### **A1.1 Assembling the *dhps* marker databases**

#### **Search strategies**

Online literature searches for the terms “malaria” and “*dhps*” in studies published up until February 2011 were conducted using the Pubmed, African Journal Online and Bioline databases.

#### **Inclusion criteria**

Criteria for inclusion were published studies of *dhps* genotypes in *P. falciparum* infections in Africa, excluding studies of malaria imported to non-African countries and studies for which the sampling year could not be determined.

#### **Data extraction and data entry**

The full text of all studies meeting the inclusion criteria was reviewed to extract the number of samples tested and number positive for *dhfr* and *dhps* mutations. Data were recorded on a standard proforma containing predesigned data fields, including geo-referenced study site and study year, and subsequently entered into a relational database. Interactive online maps for each marker are provided at [www.drugresistancemaps.org](http://www.drugresistancemaps.org) and <http://www.wwarn.org/surveyor/>.

### **A1.2 Data used for modelling**

Prevalences of all *dhps*437G, 540E and 581G markers were used to inform the *dhps*540E prevalence maps. A summary of the data used for the modelling is presented in Table A1.1 Each study was referenced spatially by the longitude and latitude of the study site and temporally by the mid-point year of the study.

The spatial location of *dhps* marker data is shown in the left hand panels of Figure

A1.1. In these spatial plots, each data point is represented by a circle on the map, where the colour represents the observed prevalence of the marker at that location and the size of the circle is proportional to the sample size of the study. The right hand panel in Figure A1.1 illustrates the number of surveys conducted for each marker in each year (from 1987 to 2008) for the *dhps* markers.

**Table A1.1 Summary of the *dhps* marker data.** Number of studies in the database, the median observed prevalence of the marker, the median year of study and the median study sample size.

| Marker          | Number of studies | Median prevalence | Median year | Median sample size |
|-----------------|-------------------|-------------------|-------------|--------------------|
| <i>dhps437G</i> | 229               | 0.57              | 2003        | 76                 |
| <i>dhps540E</i> | 238               | 0.12              | 2003        | 76                 |
| <i>dhps581G</i> | 124               | 0.00              | 2001        | 73                 |

**Figure A1.1 Summary of *dhps* marker data.** Left hand panels: Data locations for *dhps437G* (top), *dhps540E* (middle) and *dhps581G* (bottom) used in the *dhps540E* model. The colour of the data points represented the observed prevalence of the marker and the size of the circle is proportional to the sample size of the study.

Right hand panels: The number of surveys conducted for *dhps437G* (top), *dhps540E* (middle) and *dhps581G* (bottom) over the time period 1987-2008.

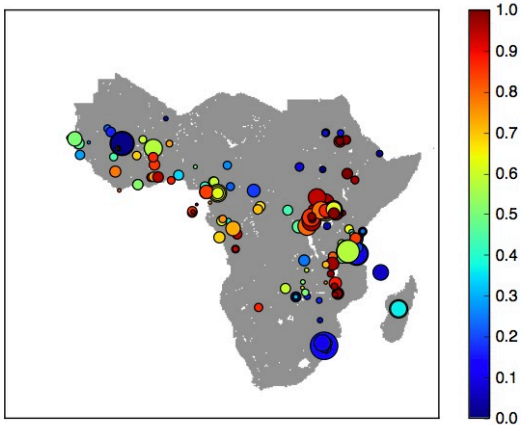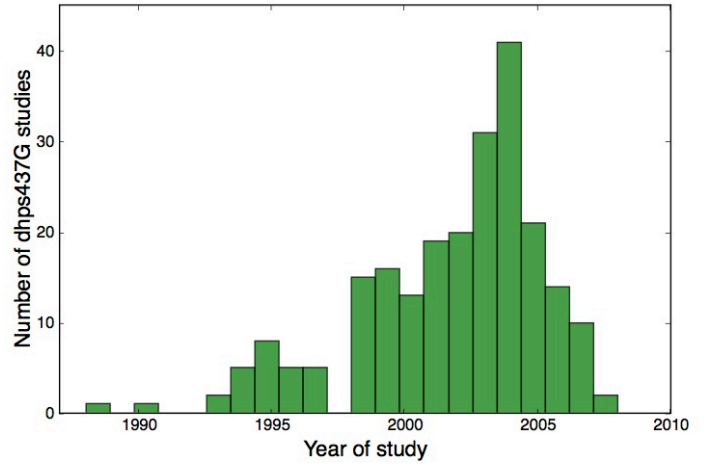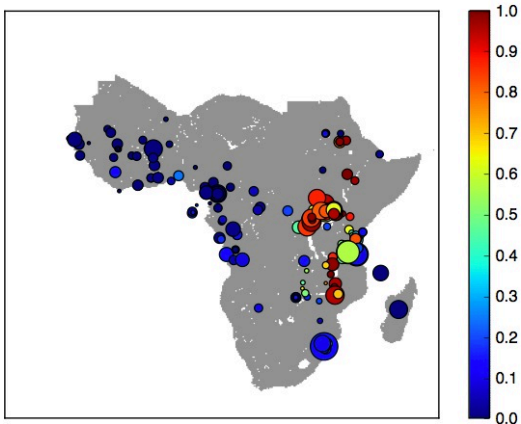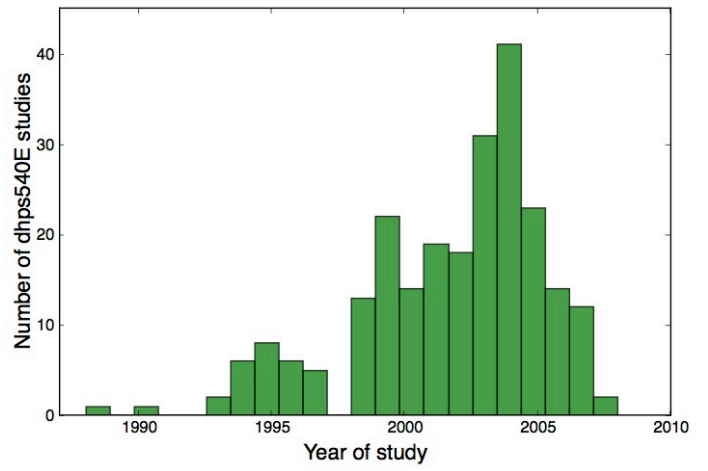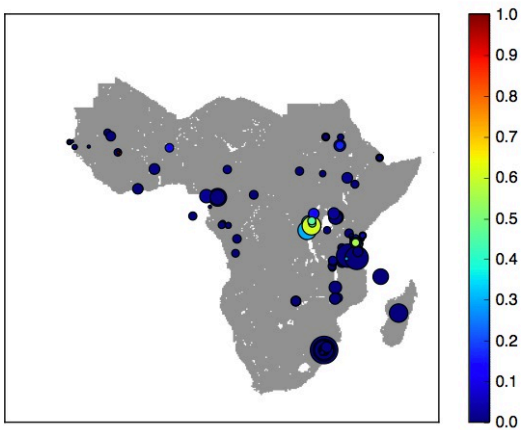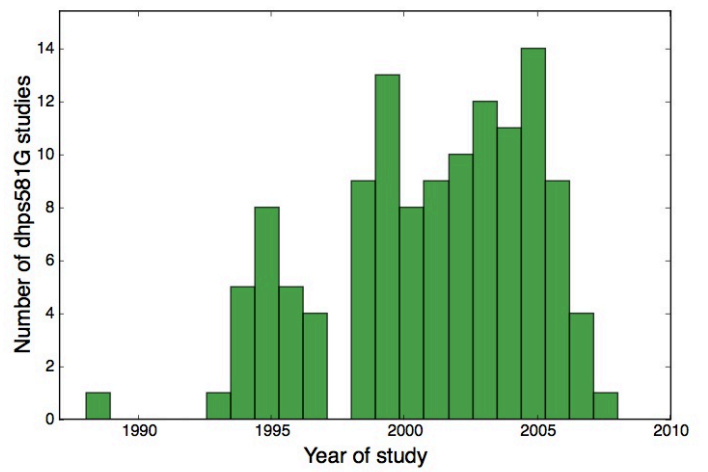

Supplement: MOESM1 [file 9544462]
